# Supplementary material for: MRPS16 facilitates tumor progression via the PI3K/AKT/Snail signaling axis
Source: PubMed Central journal article supplement (PMC7052926; doi:10.7150/jca.39671), 2020-02-03

## MRPS16 facilitates tumor progression via the PI3K/AKT/Snail signaling axis

Zhen Wang<sup>1#</sup>, Junjun Li<sup>2#</sup>, Xiaobing Long<sup>1</sup>, Liwu Jiao<sup>3</sup>, Minghui Zhou<sup>1</sup>, Kang Wu<sup>1\*</sup>

### S1. MRPS16 over-expression facilitates U-138MG cells progression.

MRPS16 over-expression promoted U-138MG cells proliferation, colony formation and migration. Representative images of the EdU (A), colony formation assay (B) and Transwell migration assay (C) with U-138MG cells.

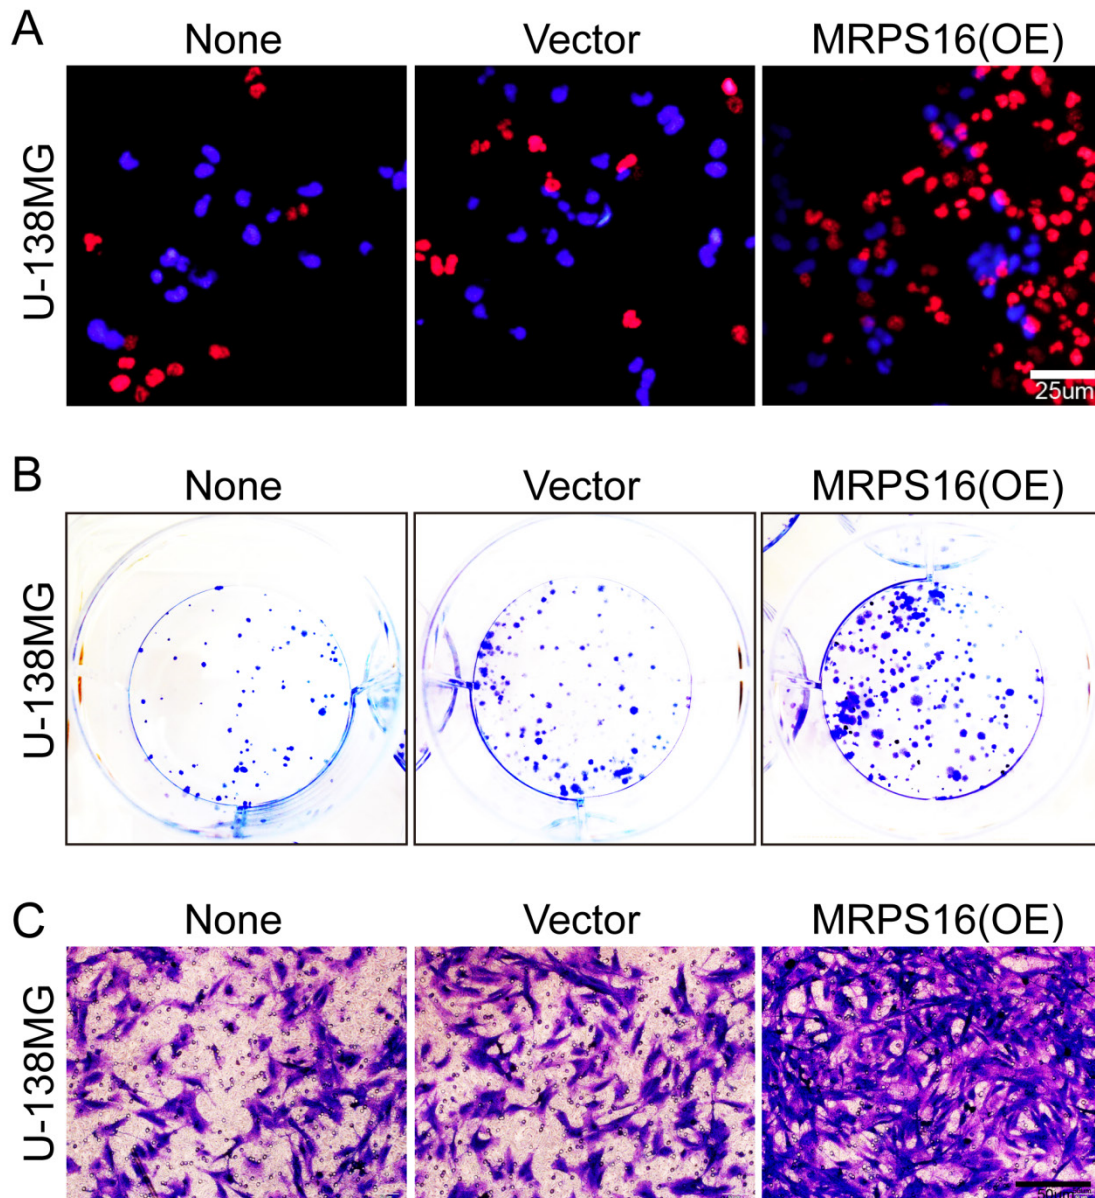

### S2. MRPS16 knockdown suppresses U-87MG cells progression.

Knockdown of MRPS16 suppressed U-87MG cells proliferation, colony formation and migration. Representative images of the EdU (A), colony formation assay (B) and Transwell migration assay (C) with U-87MG cells.

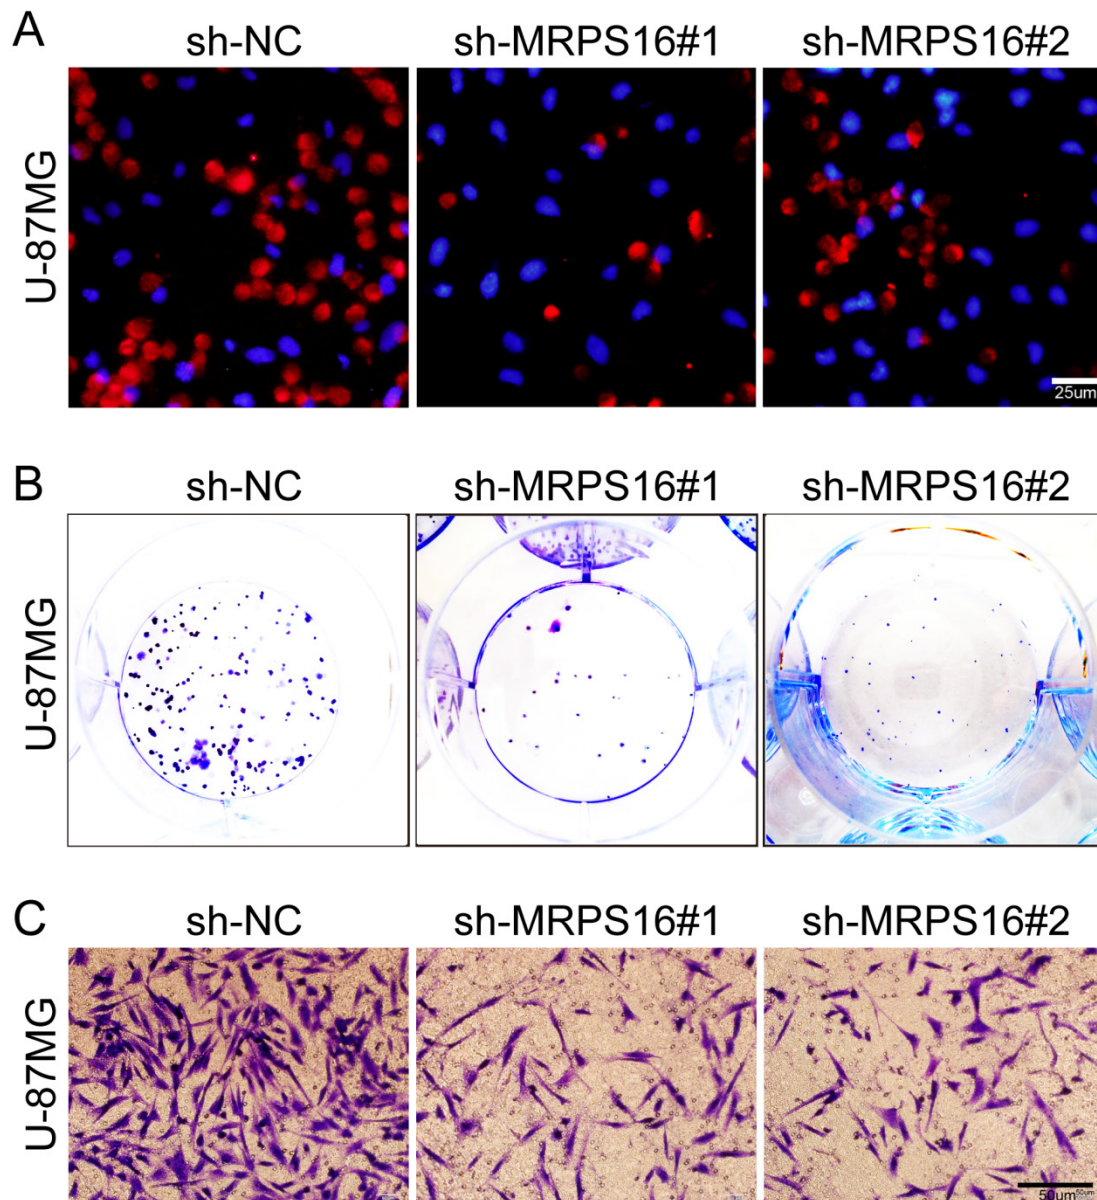

### S3. MRPS16 promotes tumor progression by the PI3K/AKT/Snail axis.

Snail over-expression rescued the effects of MRPS16 knockdown in suppressing tumor cells growth, colony formation, migration and invasion. Representative images of the EdU (A), colony formation assay (B), Transwell migration (C) and invasion (D) assay with U-138MG and U-87MG cells. E - F. PI3K/AKT signaling axis was notably suppressed by MRPS16 knockdown, while others remained unchanged. G - H. The luciferase reporter assay indicated that MRPS16 knockdown suppressed the transcription activity of PI3K/AKT signaling in U-138MG and U-87MG cells.



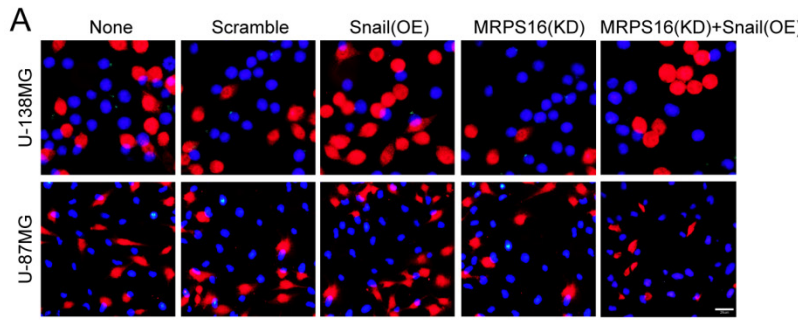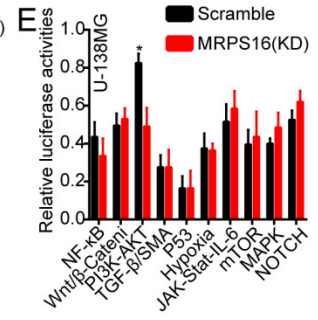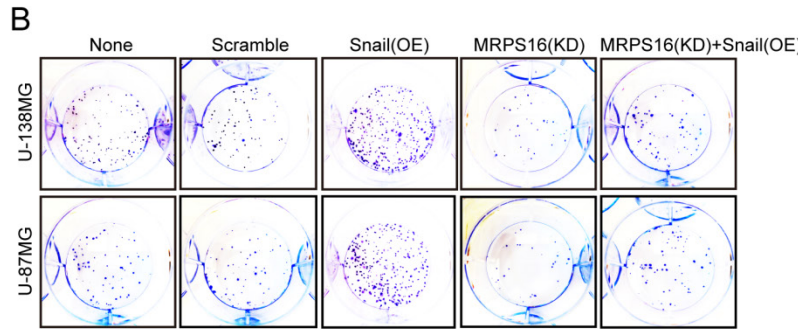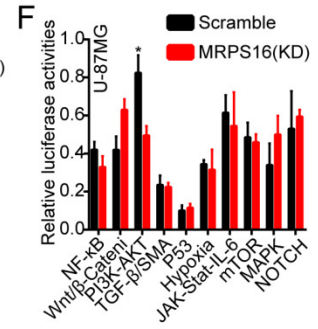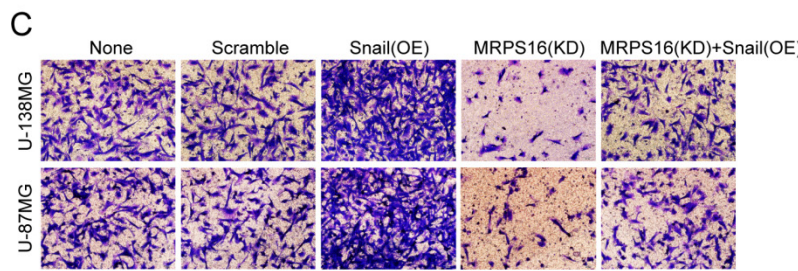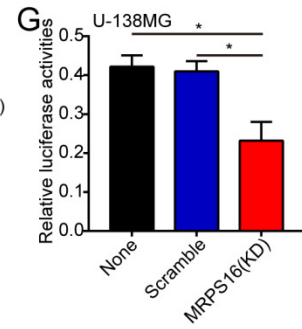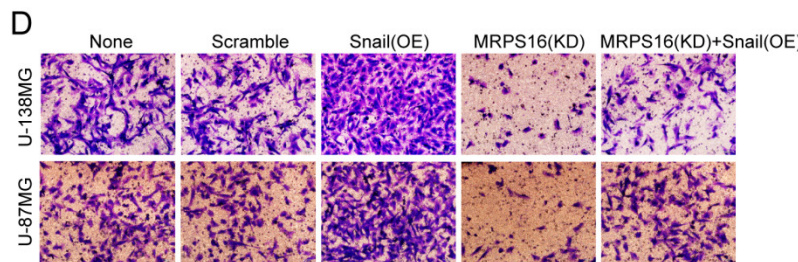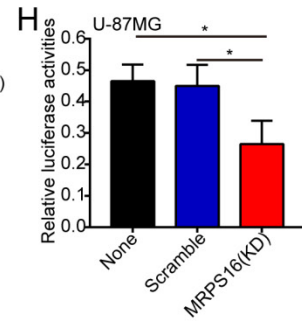

Supplement: jcav11p2032s1.pdf [file jcav11p2032s1.pdf]
